# Supplementary material for: Transcriptome Analysis of Two Different Developmental Stages of Paeonia lactiflora Seeds
Source: Hindawi journal article supplement (doi:10.1155/2017/8027626), 2017-01-01
Supplement: f1 [file 8027626.f1.pdf]

## Supplementary File 1

The results obtained by comparing the known protein database with blast:

```
>comp32191_c0;orf1   len=1089   frame:-2   start:1302   end:214   PREDICTED:

ell-associated      factor      Eaf        isoform     1         [Vitis
vinifera] >gi|147820042|emb|CAN62810.1| hypothetical protein VITISV_025292
[Vitis vinifera]

ATGGCGAACAATAATACGAGCAAAGAACCGAGCACTGCACCTGCGCCAGATCGGTGGTAT
AACCTAACCTAGGTTCTTCCTTCAAAGACCACCAGCCATCCTCTAAATTCTGCACTTTA
CGATATGAATTTAAACCAGCTTCAATTGATAAGAGTCAACCCGGGTCATTAACCAAGAAC
AAGGAAAACAGGATCTCTGTAGAATTTCACACAATCAACATGGAAAACCAAAGTGACA
TTTGAGGGAAGCAGTGAGGACTACAAAGAAAATGACGCTGTTTTGTTTTTTGACGGTGAG
ACCTTTCGGTTGGAGAGGTTACACCGAGCAGTAAAGCGGTTGAGACATGTCCGACTTCCT
GGTGAATCTGCAGCTGCAAGTACCATGGCAGCGGGTACTTCTGTTGGACCAGCAGGAGAA
TCTTTTTCACCACCAGTTGGGAAATCAACAAAGCAGTTTCAGTATTCTAATAAAAGCACA
TTTCATCCAATGCCGGTTGAGGTTGAACGGATCGATGTTGTGGACTCAGAGAGCATTGGT
ACAAAACCTAAAAACGACAAGGTTATCGACCCTCCATCATCTCATCAAAAACCAACCAACC
CCATTACCATCACCAGACCCTATGACACTCGAATTGGAGCAACATCTGGATATAATGAAC
GATGACGACGATGTTGATATTGATGGTTTCGAAACTGCAGAAAAAGGGAATAATAATACT
AATGCTGCTGCTGCTGCTGAAAAAGAAACCATCCAATCTGGTATTGATATCAACTTACCA
CAACAAAATGACACAGATGATGAGATAGCCGATGTTGATGTGAGCGATGACGATGAAGCA
GATAAAGGTCGTAATGCTGCTGAAGCGTTGAGAGCTCAGGTGAATGCTCAGGTGAATTCT
GAGCAGAGGTCACCGTCGAGGTCGAGGTCGAGCTCGAGTAGTAGTAGTAGTAGTGGGAGT
```

GATAGTAAGAGTAGCGGGAGCGGGAGCGGGAGTGGCAGTGGCAGTGGAAGTGGTAGCAGT  
AGTAGCAGCGGCAGCGGCAGTGCCAGTGGTAGTGAAAGCAGTGACGATGACTCTGTCAAC  
TCTATCTGA

Head notes: > (Sequence ID, it's the unique identifier of this gene); (orf1, Prediction of ORF ID, some genes have two predicted ORF); len: (The length of the base of the ORF); frame: (The reading frame of the ORF in the original gene, "-" denotes negative chain); start: (The initial position of the ORF in the original gene); end: (The termination of the ORF on the original gene); (The description of the gene to the protein library)

## Supplementary File 2

The CDS results predicted by Estscan software:

```
>comp26509_c0; len=81 start:1 end:80
```

```
XTGTTTGTCGGGGTAGGTGCAGTAGCACGAGTAATGTGCGAATACATTAGGCTGGACGAG
```

```
AGTTATGTTGCACTGTGTTGG
```

```
>comp31743_c0; len=354 start:427 end:74; minus strand
```

```
TCTCTAGTGTGGACTCGTATGCGTATCTCCGGTGAATAACTCGGCGTTGTCACGGGTTTG
```

```
GAAGAGAACAGGGGAGGAGGGTTTCGGTTCCTCATACTCGCTACTCGAGACCAGAGGCC
```

```
GCCAAAATCAGCGAACCCAGGGATAACCGATCGGCGAATCGCGAGGCTCAAGCCAGACCG
```

```
GCAAACCATGGGGCTCTAGCTGAXCAGGCGAACCACAGGCCACCGATCAGCGAACCTACA
```

```
GGTTCAAGCCGATTGAGCGAACTCGCTAGCAAATTGGAGCCTGATGAAACTCTAGCAATA
```

```
TCAGTCATTAACGCCGACAAAGCAATTATTTTGCTTGATTTCAACAGAAATTAA
```

Head notes: > (Sequence ID, it's the unique identifier of this gene); (a represents another ORF of the gene); len: (The length of the base of the ORF); start: (The initial position of the ORF in the original gene); end: (The termination of the ORF on the original gene); (minus strand represents the ORF in the original transcript is a negative chain)
